# Supplementary material for: Synthesis, optical properties and cation mediated tuning of the reduction potentials of core-annulated naphthalene diimide derivatives
Source: Royal Society of Chemistry journal article supplement (doi:10.1039/d2qo00399f), 2022-01-01
Supplement: d2qo00399f1.pdf [file d2qo00399f1.pdf]

*Supporting Information*

for

**Synthesis, optical properties and cation mediated  
tuning of reduction potentials of core-annulated  
naphthalene diimide derivatives**

*Tirupati Roy, Indraneel Debnath, and Kingsuk Mahata\**

*Department of Chemistry, Indian Institute of Technology Guwahati, Guwahati -781039, India.  
email: kingsuk@iitg.ac.in, Fax: (+91) 361-258-2349*

**Table of contents**

|                                                             |     |
|-------------------------------------------------------------|-----|
| 1. Materials and Methods.....                               | S2  |
| 2. Synthesis.....                                           | S3  |
| 3. <sup>1</sup> H and <sup>13</sup> C NMR spectroscopy..... | S10 |
| 4. Mass spectra.....                                        | S16 |
| 5. IR Spectra.....                                          | S18 |
| 6. UV-vis and photoluminescence spectroscopy.....           | S19 |
| 7. Electrochemistry.....                                    | S23 |
| 8. References.....                                          | S26 |

## 1. Materials and Methods

Naphthalene-1,4,5,8-tetracarboxylic dianhydride, zinc trifluoromethanesulfonate salt, and [Pd(dppf)]Cl<sub>2</sub> were purchased from Alfa-Aesar. Deuterated solvents (CDCl<sub>3</sub>: 99.8 atom % D; CD<sub>3</sub>CN: 99.8 atom % D), and 2-ethyl-1-hexylamine were procured from Sigma Aldrich. Triflic acid, 2-aminopyridine and *t*-BuONa were purchased from Spectrochem. Trifluoroacetic acid, HCl and triethylamine were purchased from Merck. DBH was procured from Avra. UV and HPLC grade solvents were purchased from either Merck or Spectrochem. Tetrabutylammonium hexafluorophosphate was purchased from TCI. All of the above mentioned reagents were used without further purification. Neutral alumina (activity-II) for column chromatography was procured from Merck. Silica gel for column chromatography (60-120 mesh) was obtained from Spectrochem. Analytical thin layer chromatography (TLC) plate (silica gel 60 F254) was purchased from Merck.

Reactions were monitored by TLC and visualised under 254 nm and 365 nm UV-light. <sup>1</sup>H and <sup>13</sup>C NMR measurements were done at 293K either on a Bruker Avance 500 MHz NMR spectrometer or on a Bruker Avance III 600 MHz NMR spectrometer using deuterated solvent as the lock and residual solvent as the internal reference. Chemical shifts are reported in δ (ppm) relative to the residual solvent peak (CDCl<sub>3</sub>: 7.26 for <sup>1</sup>H, 77.0 for <sup>13</sup>C; CD<sub>3</sub>CN: 1.94 for <sup>1</sup>H). The following abbreviations were utilized to describe peak patterns: s = singlet, d = doublet, t = triplet, br = broad, and m = multiplet. The numbering of the carbon atoms of the molecular formulae shown in the experimental section is only used for the assignments of the NMR signal and is not in accordance with the IUPAC nomenclature rules. High resolution mass spectrometry (HRMS) measurements were done with Agilent QTOF 6520 mass spectrometer using electrospray ionization (ESI) mode. Infra-red (IR) spectra were collected on a diamond tipped Perkin-Elmer Spectrum Two FT-IR spectrometer and frequencies are presented in reciprocal centimeter (cm<sup>-1</sup>). UV-vis absorption measurements were carried out on a Cary-100 UV-Vis spectrophotometer at 293K. Photoluminescence properties were studied on a Horiba Fluoromax fluorimeter. Corrections of the spectra were done by the correction factor implemented in the software. For photophysical measurements, quartz UV-cuvettes of 10 mm path length were used. Cyclic voltammetry measurements were done in dry and deoxygenated chloroform and acetonitrile using PGSTAT101 potentiostat from Metrohm® and the corresponding software NOVA 1.11.

Compound **aBr<sub>2</sub>NDI** and **bBrNDI** were prepared following literature procedure.<sup>1</sup> All of the coupling reactions were carried out under Argon atmosphere. The highest occupied molecular orbital (HOMO) and LUMO energy levels of the doubly-annulated imide was calculated by the DFT/B3LYP method with 6-31+G(d,p) basis set in chloroform.<sup>2</sup>

## 2. Synthesis

### Synthesis of AmPyDI

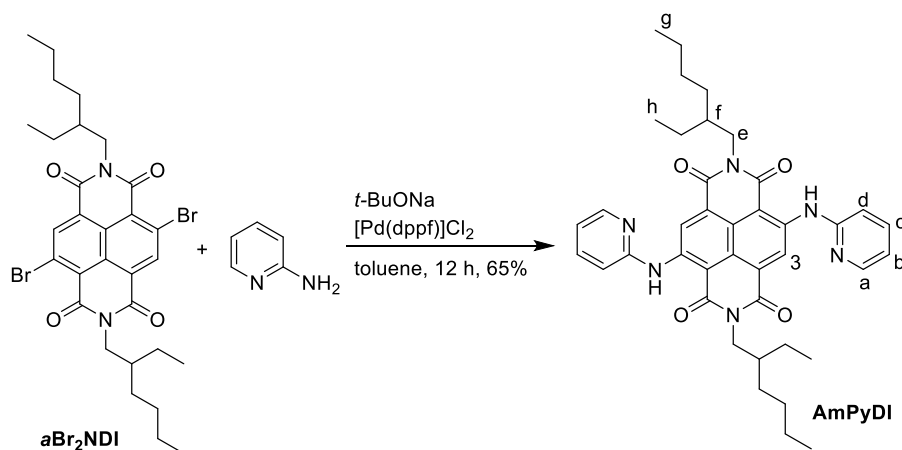

2-Aminopyridine (44.0 mg, 461  $\mu\text{mol}$ ) was loaded in to a 100 mL two-neck round bottomed flask under inert condition. After addition of 4 mL of toluene, *t*-BuONa (44.0 mg, 461  $\mu\text{mol}$ ) and [Pd(dppf)]Cl<sub>2</sub> (6.00 mg, 7.60  $\mu\text{mol}$ ) were added. Finally, **aBr<sub>2</sub>NDI** (100 mg, 153  $\mu\text{mol}$ ) was added to the reaction mixture, and subsequently refluxed for 12 h. The reaction mixture was then cooled down to room temperature, and 20 mL of hexane was added to precipitate out the product, which was separated by filtration. After washing with hexane (3 x 40 mL), the precipitate was dissolved in 1 mL of chloroform. The crude mixture was further precipitated out by adding 20 mL of methanol. The purple residue was separated by filtration and washed with hexane (3 x 40 mL). After drying in vacuum, **AmPyDI** was received as purple solid. Yield: 67.0 mg (65%) <sup>1</sup>H NMR (500 MHz, CDCl<sub>3</sub>)  $\delta$  12.13 (s, 2H, N-H), 10.14 (s, 2H, 3-H), 8.48 (dd, <sup>3</sup>*J* = 5.5 Hz, <sup>4</sup>*J* = 2.0 Hz 2H, a-H), 7.70 (ddd, <sup>3</sup>*J* = 7.0 Hz, <sup>3</sup>*J* = 8.0 Hz, <sup>4</sup>*J* = 2.0 Hz, 2H, c-H), 7.09 (d, <sup>3</sup>*J* = 8.0 Hz, 2H, d-H), 7.02 (dd, <sup>3</sup>*J* = 7.0 Hz, <sup>3</sup>*J* = 5.5 Hz, 2H, b-H), 4.22-4.14 (m, 4H, e-H), 2.02-1.96 (m, 2H, f-h), 1.43-1.37 (m, 8H), 1.35-1.29 (m, 8H), 0.94 (t, <sup>3</sup>*J* = 7.5 Hz, 6H, [g/h]-H), 0.89 (t, <sup>3</sup>*J* = 7.0 Hz, 6H, [g/h]-H) ppm.; <sup>13</sup>C NMR (150 MHz, CDCl<sub>3</sub>)  $\delta$  167.0, 163.1, 153.6, 148.2, 144.7, 138.1, 125.7, 124.3, 122.5, 118.2, 114.5, 104.8, 44.5, 37.7, 30.7, 28.7, 24.0, 23.1, 14.1, 10.7 ppm.; HRMS (ESI) *m/z* calculated for [C<sub>40</sub>H<sub>46</sub>N<sub>6</sub>O<sub>4</sub>+H]<sup>+</sup> 675.3653, found: 675.3651; IR 2958, 1690, 1663, 1590, 1466, 1292, 1198, 1153, 773 cm<sup>-1</sup>; UV-vis (CHCl<sub>3</sub>)  $\lambda_{\text{max}}$ /nm ( $\epsilon$ /M<sup>-1</sup>cm<sup>-1</sup>) 587 (90 400); mp > 200 °C.

## Synthesis of *aImPyDI* from *AmPyDI*

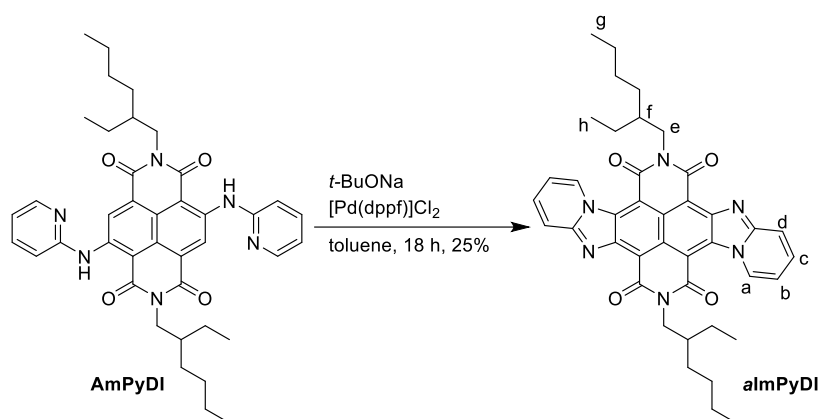

Under an inert condition **AmPyDI** (40.0 mg, 59.0  $\mu\text{mol}$ ),  $[\text{Pd}(\text{dppf})\text{Cl}_2]$  (5.00 mg, 6.00  $\mu\text{mol}$ ) and  $t\text{-BuONa}$  (23.0 mg, 240  $\mu\text{mol}$ ) were refluxed in argon-purged toluene (10 mL) in an oven-dried 100-mL two-neck round-bottom flask for 18 h. After cooling down the reaction mixture to room temperature, the dark precipitate was separated. The residue was then washed successively with hexane (3 x 50 mL) and DCM (2 x 20 mL). Finally, the crude product was purified by column chromatography in neutral alumina using DCM as eluent. The analytically pure product **aImPyDI** was obtained as green solid. Yield 9.00 mg (25%).  $^1\text{H}$  NMR (600 MHz,  $\text{CDCl}_3$ )  $\delta$  10.32 (d,  $^3J = 7.2$  Hz, 2H, a-H), 8.08 (d,  $^3J = 8.4$  Hz, 2H, d-H), 7.77 (dd,  $^3J = 7.8$  Hz,  $^3J = 8.4$  Hz, 2H, c-H), 7.04 (dd,  $^3J = 7.2$  Hz,  $^3J = 7.8$  Hz, 2H, b-H), 4.44-4.36 (m, 4H, e-H), 2.24-2.19 (m, 2H, f-H), 1.53-1.47 (m, 8H), 1.44-1.29 (m, 8H), 1.00 (t,  $^3J = 7.2$  Hz, 6H, [g/h]-H), 0.09 (t,  $^3J = 7.2$  Hz, 6H, [g/h]-H), ppm.;  $^{13}\text{C}$  NMR (150 MHz,  $\text{CDCl}_3$ )  $\delta$  163.5, 162.0, 156.7, 135.4, 134.6, 133.6, 121.9, 118.7, 113.3, 112.9, 111.4, 45.1, 38.0, 31.0, 28.7, 24.3, 23.2, 14.1, 10.7 ppm.; HRMS (ESI)  $m/z$  calculated for  $[\text{C}_{40}\text{H}_{42}\text{N}_6\text{O}_4+\text{H}]^+$  671.3340, found: 671.3315; IR 3035, 2954, 2849, 2870, 1699, 1644, 1579, 1515, 1467, 1441, 1389, 1378, 1364, 1321, 1303, 1273, 1252, 1226, 1205, 1179, 1145, 1119, 1077, 879, 858, 788, 753  $\text{cm}^{-1}$ ; UV-vis ( $\text{CHCl}_3$ )  $\lambda_{\text{max}}/\text{nm}$  ( $\epsilon/\text{M}^{-1}\text{cm}^{-1}$ ) 667 (35 140); mp 186  $^\circ\text{C}$ .

## Synthesis of *aImPyDI* from *aBr<sub>2</sub>NDI*

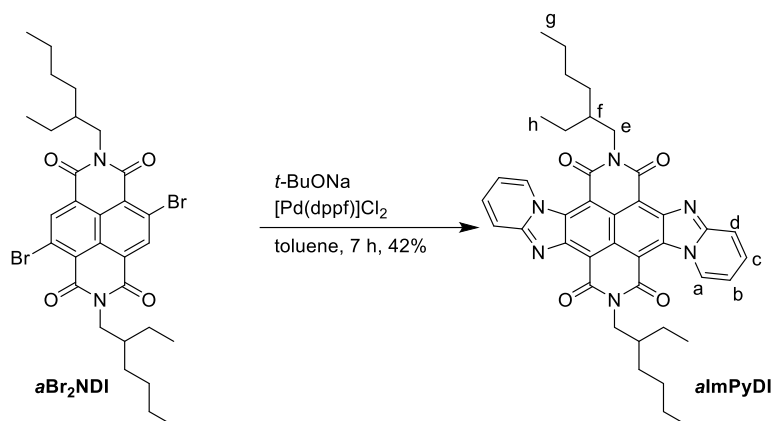

Into a 100 mL two-neck round-bottom flask was added compound ***aBr<sub>2</sub>NDI*** (120 mg, 185  $\mu\text{mol}$ ) 2-aminopyridine (43.0 mg, 462  $\mu\text{mol}$ ), *t*-BuONa (106 mg, 1.11 mmol.) and [Pd(dppf)]Cl<sub>2</sub> (14.0 mg, 18.5  $\mu\text{mol}$ ) under inert atmosphere. After addition of argon-purged toluene (15mL), the reaction mixture was refluxed for 7 h. It was then cooled down to room temperature. The dark precipitate was separated by filtration, washed successively with hexane (3 x 50 mL) and DCM (2 x 40 mL). The crude product was purified using column chromatography (neutral alumina) with DCM/hexane (4:1) mixture as eluent. The desired product was obtained as green solid in 42% yield (50.0 mg).

## Synthesis of *bImPyDI*

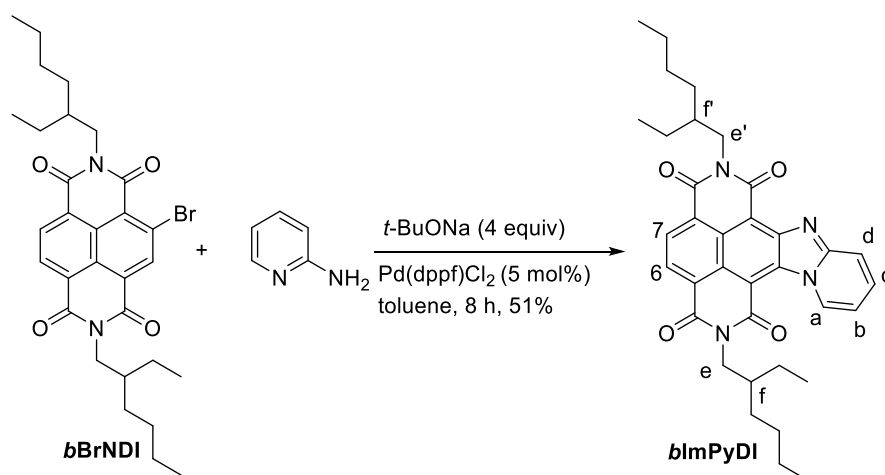

Under an inert condition ***bBrNDI*** (75.0 mg, 130  $\mu\text{mol}$ ), 2-aminopyridine (25.0 mg, 260  $\mu\text{mol}$ ), *t*-BuONa (56.0 mg, 520  $\mu\text{mol}$ ) and [Pd(dppf)]Cl<sub>2</sub> (10.0 mg, 13.0  $\mu\text{mol}$ ) were refluxed in argon-purged toluene (15 mL) in an oven-dried 100-mL two-neck round-bottom flask for 7 h. After

cooling down the reaction mixture to room temperature, the precipitate separated, and washed with hexane (3 x 50 mL). The crude product was purified to further purification by column chromatography in silica gel with DCM as eluent. Compound **bImPyDI** was received as magenta coloured solid. Yield 41.0 mg (51%). <sup>1</sup>H NMR (500 MHz, CDCl<sub>3</sub>) δ 10.54 (d, <sup>3</sup>J = 6.5 Hz, 1H, a-H), 8.93 (d, <sup>3</sup>J = 7.5 Hz, 1H, [6/7]-H), 8.87 (d, <sup>3</sup>J = 7.5 Hz, 1H, [6/7]-H), 8.08 (d, <sup>3</sup>J = 7.5 Hz, 1H, d-H), 7.79 (dd, <sup>3</sup>J = 7.5 Hz, <sup>3</sup>J = 7.5 Hz, 1H c-H), 7.06 (dd, <sup>3</sup>J = 7.5 Hz, <sup>3</sup>J = 6.5 Hz, 1H, b-H), 4.33-4.22 (m, 4H, [e.e']-H), 2.14-2.09 (m, 1H, [f/f']-H), 2.07-2.02 (m, 1H, [f/f']-H), 1.46-1.27 (m, 16H), 1.00-0.94 (m, 6H), 0.91-0.86 (m, 6H) ppm.; <sup>13</sup>C NMR (150 MHz, CDCl<sub>3</sub>) δ 163.5, 163.4, 163.2, 162.2, 156.9, 147.8, 135.5, 134.8, 133.6, 130.7, 129.6, 126.4, 126.2, 125.5, 122.2, 118.8, 113.9, 113.1, 111.7, 45.0, 44.6, 37.8 (2C), 30.8, 30.6, 28.8, 28.5, 24.1, 23.9, 23.1, 14.2, 14.1, 10.7, 10.6 ppm.; HRMS (ESI) m/z calculated for [C<sub>35</sub>H<sub>40</sub>N<sub>4</sub>O<sub>4</sub>+H]<sup>+</sup> 581.3182, found: 581.3151; IR 2957, 2919, 2870, 1700, 1651, 1580, 1510, 1459, 1378, 1332, 1273, 1244, 1205, 1084, 975, 773, 749 cm<sup>-1</sup>. UV-vis (CHCl<sub>3</sub>) λ<sub>max</sub> /nm (ε /M<sup>-1</sup>cm<sup>-1</sup>) 537 (7830), 412 (12730) cm<sup>-1</sup>; mp > 200 °C.

### Optimisation of condition for the synthesis of *aImPyDI* in two-step procedure

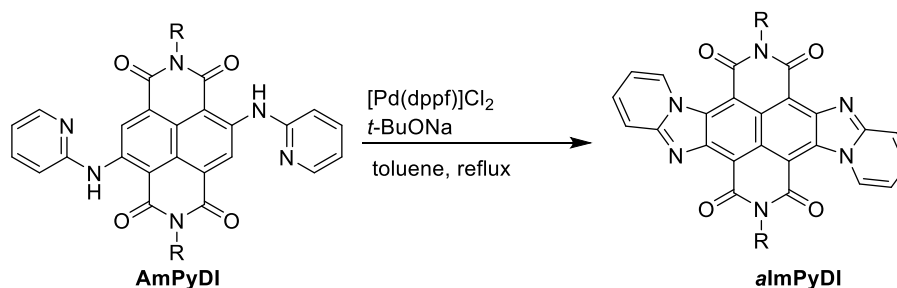

**Table S1.**

| Sl no | [Pd(dppf)]Cl <sub>2</sub> | <i>t</i> -BuONa (equiv) | solvent | yield (%) (for final step) | over all yield (%) |
|-------|---------------------------|-------------------------|---------|----------------------------|--------------------|
| 1.    | 10 mol%                   | 2.5                     | toluene | 20                         | 13                 |
| 2.    | 10 mol%                   | 4.0                     | toluene | 25                         | 16                 |
| 3.    | 10 mol%                   | 6.0                     | toluene | 25                         | 16                 |

## Optimisation of condition for single-step synthesis of *aImPyDI*

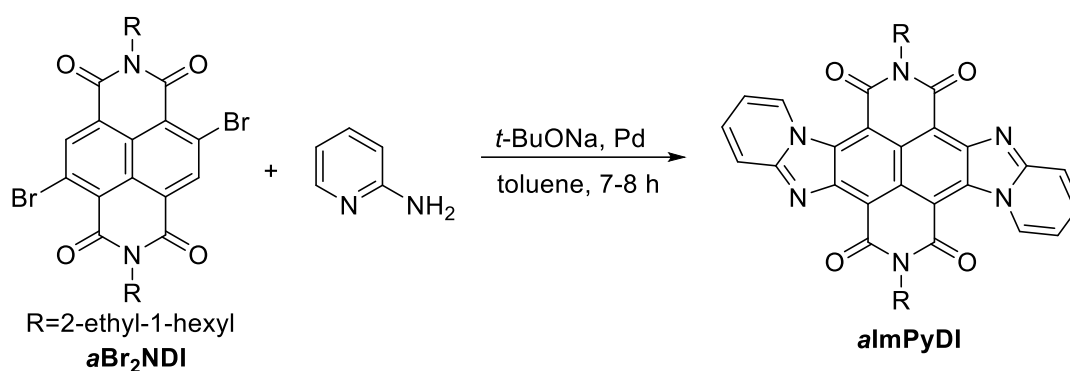

**Table S2.** Optimization of reaction conditions

| Sl.No.   | Catalyst (10 mol%)                 | <i>t</i> -BuONa (equiv) | Solvent        | Yield (%) |
|----------|------------------------------------|-------------------------|----------------|-----------|
| 1        | [Pd(dppf)]Cl <sub>2</sub>          | 2.5                     | Toluene        | Trace     |
| 2        | [Pd(dppf)]Cl <sub>2</sub>          | 4                       | Toluene        | 15        |
| <b>3</b> | <b>[Pd(dppf)]Cl<sub>2</sub></b>    | <b>6</b>                | <b>Toluene</b> | <b>42</b> |
| 4        | [Pd(dppf)]Cl <sub>2</sub>          | 6                       | DMF            | 10        |
| 5        | [Pd(dppf)]Cl <sub>2</sub>          | 6                       | 1,4-Dioxane    | Trace     |
| 6        | Pd(OAc) <sub>2</sub>               | 6                       | Toluene        | 22        |
| 7        | Pd(PPh <sub>3</sub> ) <sub>4</sub> | 6                       | Toluene        | 15        |

## Synthesis of zinc complex of *aImPyDI*

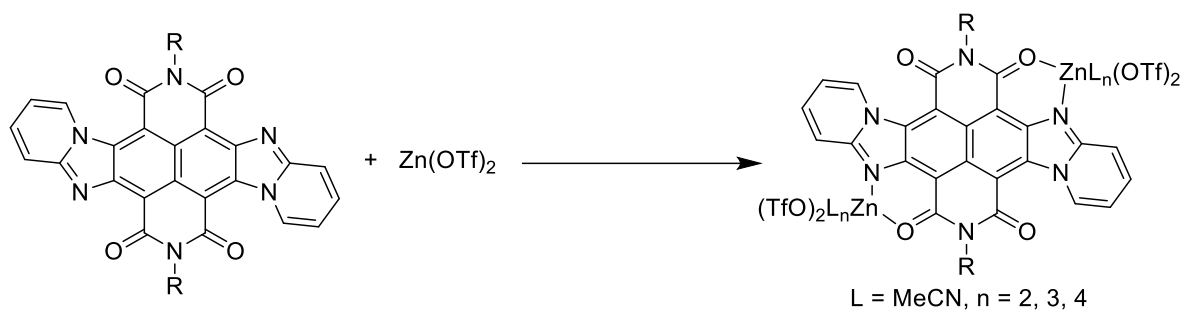

**Method A:** A mixture of the ligand *aImPyDI* (3.00 mg, 4.46 μmol) and excess of zinc trifluoromethanesulfonate (6.68 mg, 18.4 μmol) were loaded into a 10 mL sealed tube. After addition of 1.5 mL of acetonitrile, the suspension was sonicated at 45 °C for 1.5 h until a clear green solution appeared. The resulting solution was subjected to analytical characterization and investigations without doing further purification.

**Method B:** To a clear solution of the dye in chloroform, was added excess of zinc trifluoromethanesulfonate (4 eq.) in acetonitrile. The mixture was sonicated for 30 minutes at 45 °C before it was used for further investigation.

Yield: quantitative.  $^1\text{H}$  NMR (500 MHz,  $\text{CD}_3\text{CN}$ )  $\delta$  10.23 (br, 2H, a-H), 8.38 (d,  $^3J = 7.5$  Hz, 2H, d-H), 8.26 (dd,  $^3J = 7.5$  Hz,  $^3J = 6.0$  Hz, 2H, c-H), 7.49 (br, 2H, b-H), 4.41 (br, 4H, e-H), 2.16 (br, 2H, f-H), 1.52-1.49 (m, 8H), 1.39-1.30 (m, 8H), 1.01 (br, 6H, [g/h]-H), 0.91 (br, 6H, [g/h]-H), ppm.  $\lambda_{\text{max}}$  /nm ( $\epsilon$  / $\text{M}^{-1}\text{cm}^{-1}$ ) 637 (29820) 452 (26720) ( $\text{CHCl}_3/\text{MeCN}$  30:1 v/v).

### Synthesis of zinc complex of *bImPyDI*

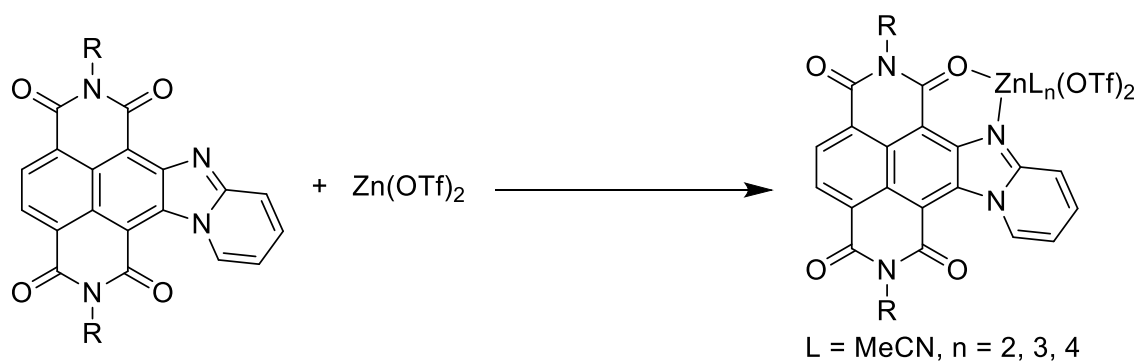

**Method A:** A 1:1 mixture of the ligand *bImPyDI* (3.00 mg, 5.10  $\mu\text{mol}$ ) and zinc trifluoromethanesulfonate (1.85 mg, 5.10  $\mu\text{mol}$ ) were loaded into a 10 mL sealed tube. After addition of 1.0 mL of acetonitrile, the suspension was sonicated at 45  $^\circ\text{C}$  for 1 h until a clear peach colour solution appeared. The resulting complex was subjected to analytical characterization and investigations without doing further purification.

**Method B:** To a clear solution of the dye in chloroform, was added one equivalent of zinc trifluoromethanesulfonate in acetonitrile. The mixture was sonicated for 30 minutes at 45  $^\circ\text{C}$  before it was used for further investigation.

Yield: quantitative.  $^1\text{H}$  NMR (500 MHz,  $\text{CDCl}_3/\text{CD}_3\text{CN}$  40:1)  $\delta$  10.67 (d,  $^3J = 4.5$  Hz, 1H, a-H), 8.90 (d,  $^3J = 6.5$  Hz, 1H, [6/7]-H), 8.84 (d,  $^3J = 6.5$  Hz, 1H, [6/7]-H), 8.62 (br, 1H, d-H), 8.11 (br, 1H, c-H), 7.39 (br, 1H, b-H), 4.24-4.17 (m, 2H, [e/e']-H), 3.88 (br, 2H, [e/e']-H), 1.38-1.17 (m, 12H), 0.96-0.75 (m, 12H), 0.44-0.35 (m, 6H) ppm.  $\lambda_{\text{max}}$  /nm ( $\epsilon$  / $\text{M}^{-1}\text{cm}^{-1}$ ) 536 (7830) ( $\text{CHCl}_3/\text{MeCN}$  300/1 v/v).



### **General procedure for Halochromism**

Halochromism was studied by acidification of the compounds. As dissociation of acid in organic solvents is not quantitative, more than stoichiometric amount of acids were needed. In a typical experiment 3 mL of the compound was taken in cuvette. Acid were added gradually until protonation was complete. The deprotonation of the acidified compounds in chloroform was achieved by treatment with triethylamine. After treatment with base, the respective solutions were checked by UV-vis spectroscopy. The initial spectra of the compounds and deprotonated ( $x\text{ImPyDIH}^+$ )  $X^-$  [ $x = a$  or  $b$ ,  $X = \text{CF}_3\text{CO}_2^-$ ,  $\text{SO}_4^{2-}$ ,  $\text{CF}_3\text{SO}_3^-$ ,] were found to be same. This experiment confirmed reversibility of the process.

### 3. $^1\text{H}$ and $^{13}\text{C}$ NMR Spectra

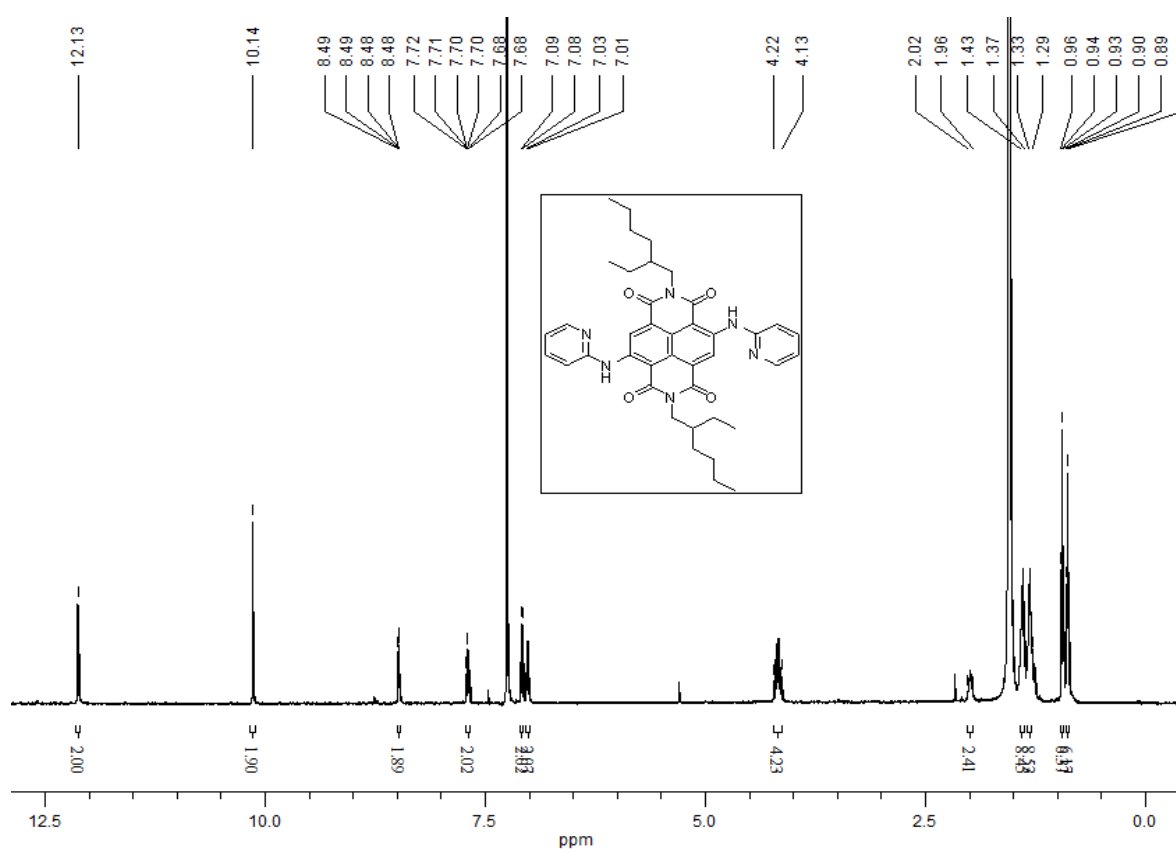

Fig. S1  $^1\text{H}$  NMR spectra of AmPyDI (500 MHz,  $\text{CDCl}_3$ , 293K).

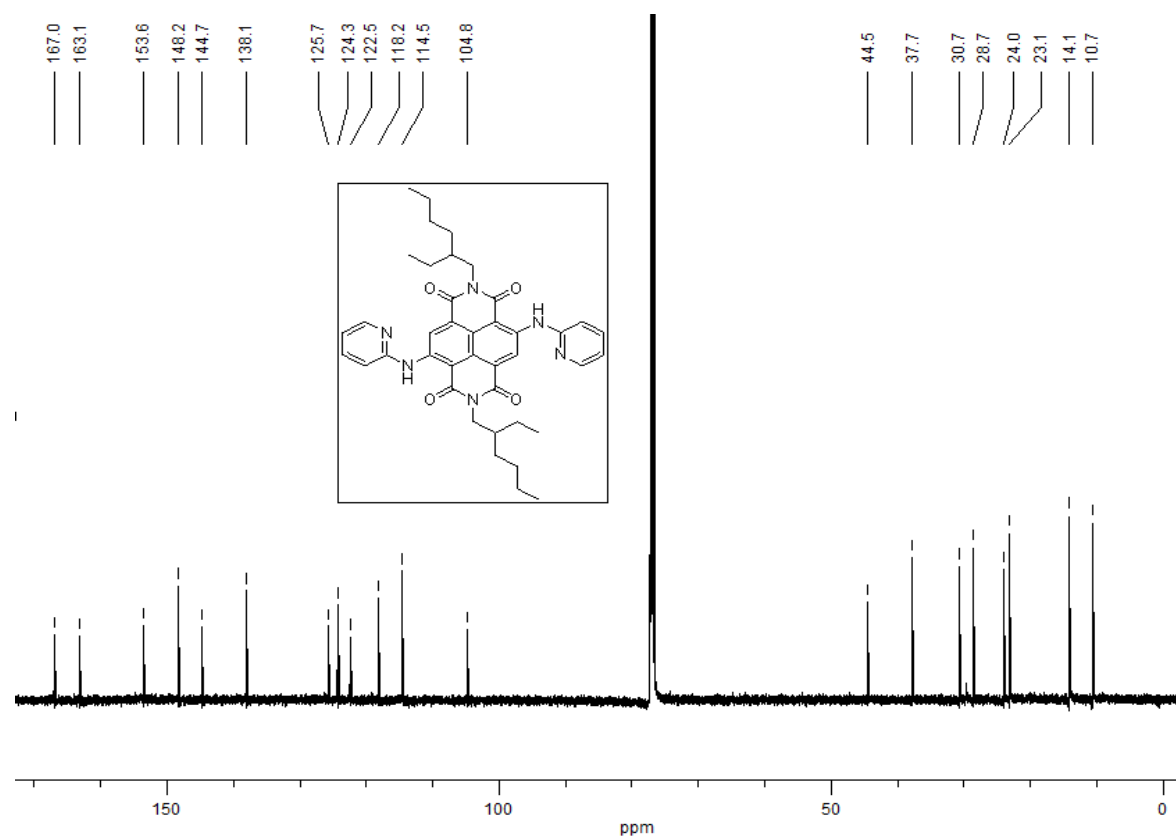

Fig. S2  $^{13}\text{C}$  NMR spectra of AmPyDI (150 MHz,  $\text{CDCl}_3$ , 293K).

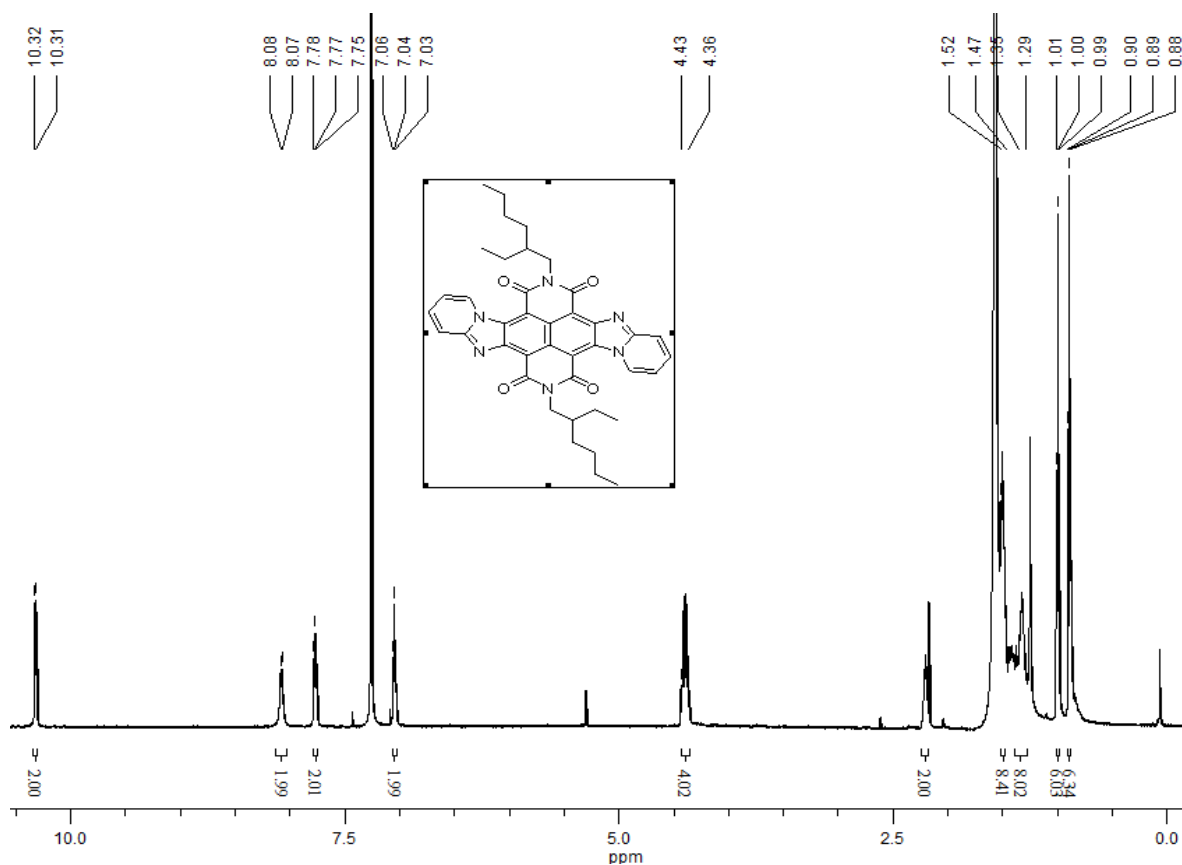

**Fig. S3**  $^1\text{H}$  NMR spectra of *aImPyDI* (600 MHz,  $\text{CDCl}_3$ , 293K).

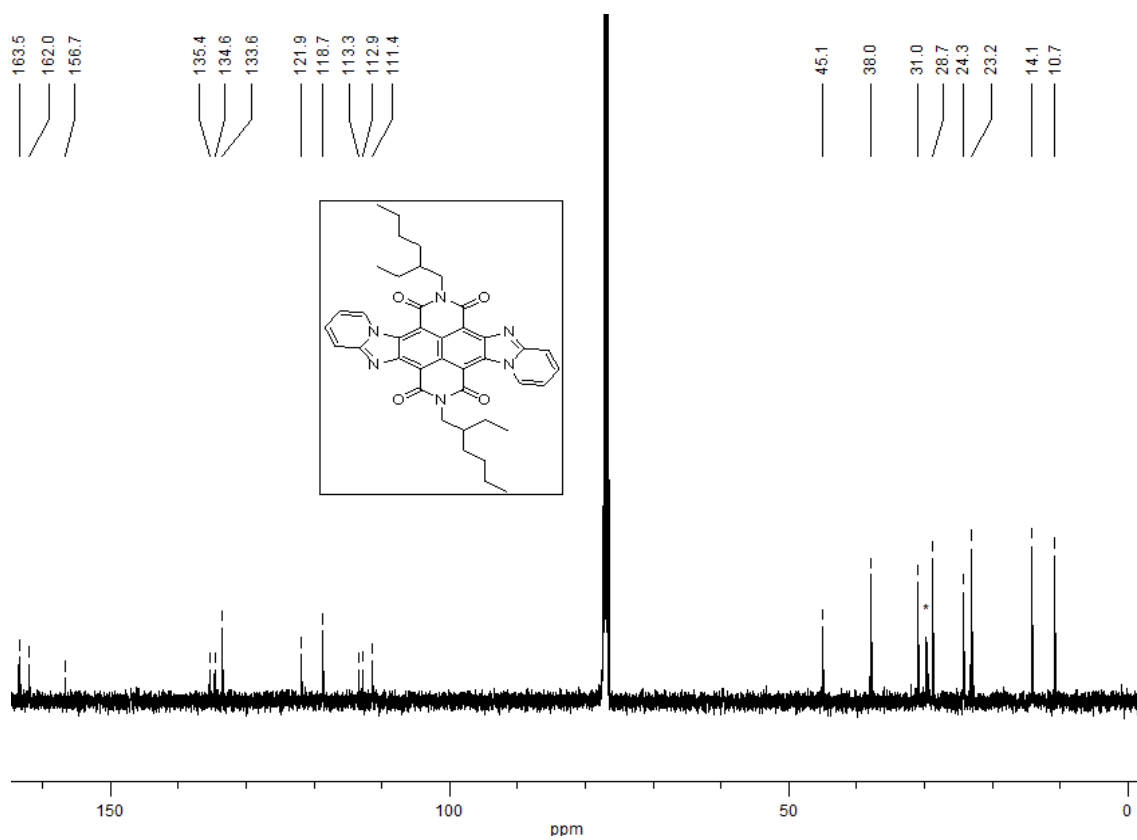

**Fig. S4**  $^{13}\text{C}$  NMR spectra of *aImPyDI* (150 MHz,  $\text{CDCl}_3$ , 293K).

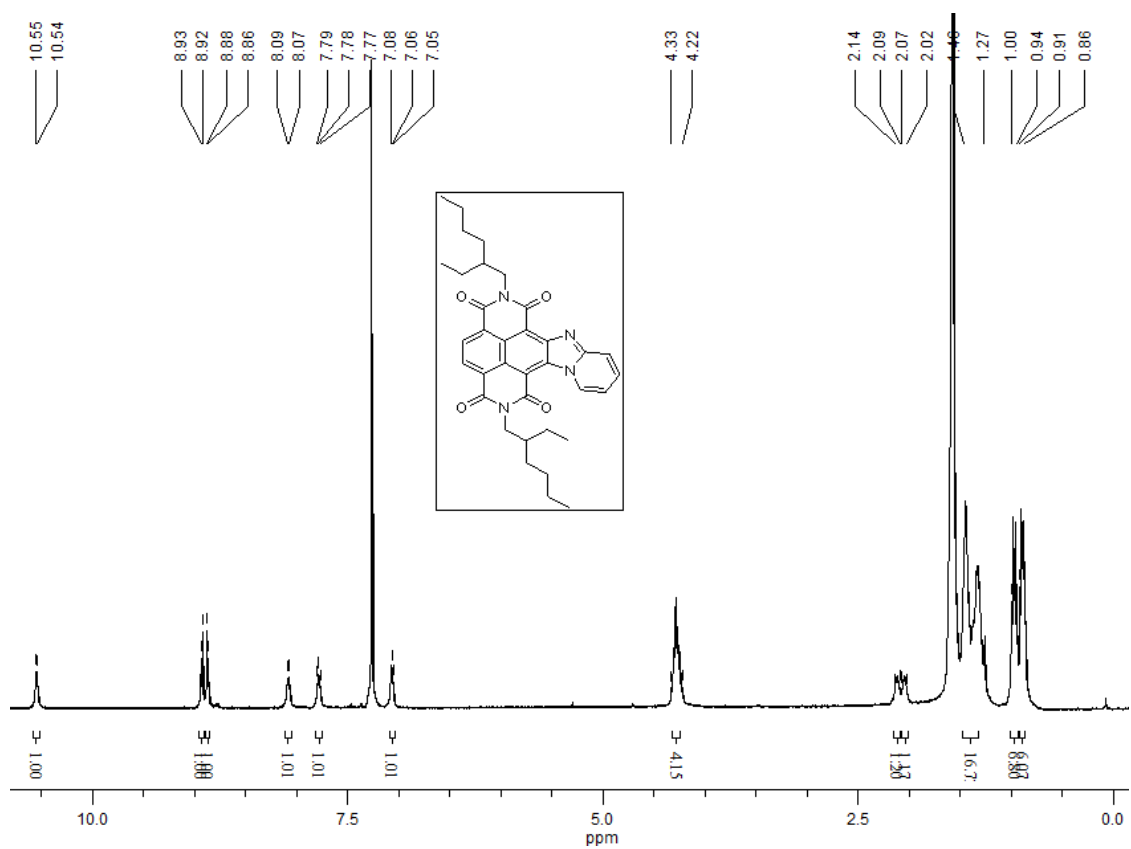

**Fig. S5**  $^1\text{H}$  NMR spectra of *bImPyDI* (500 MHz,  $\text{CDCl}_3$ , 293K).

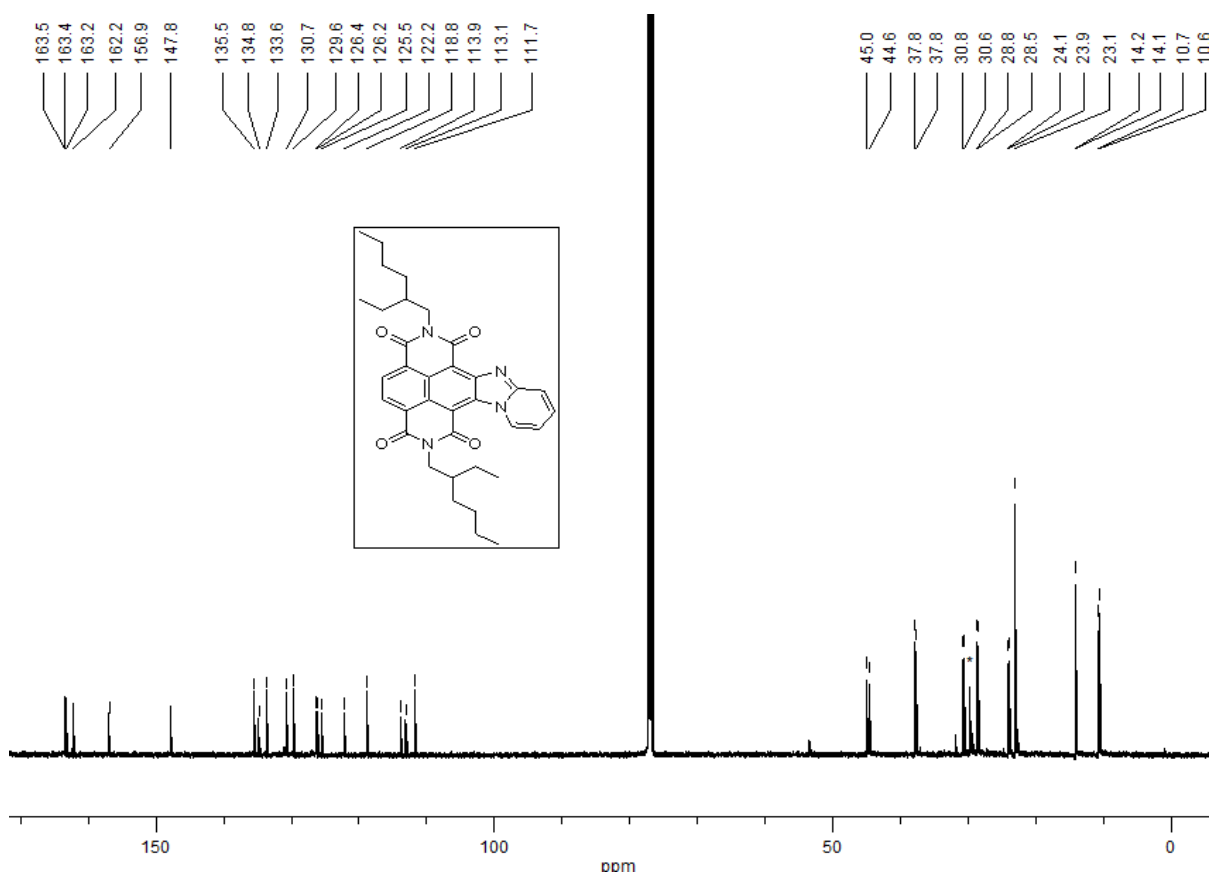

**Fig. S6**  $^{13}\text{C}$  NMR spectra of *bImPyDI* (150 MHz,  $\text{CDCl}_3$ , 293K).

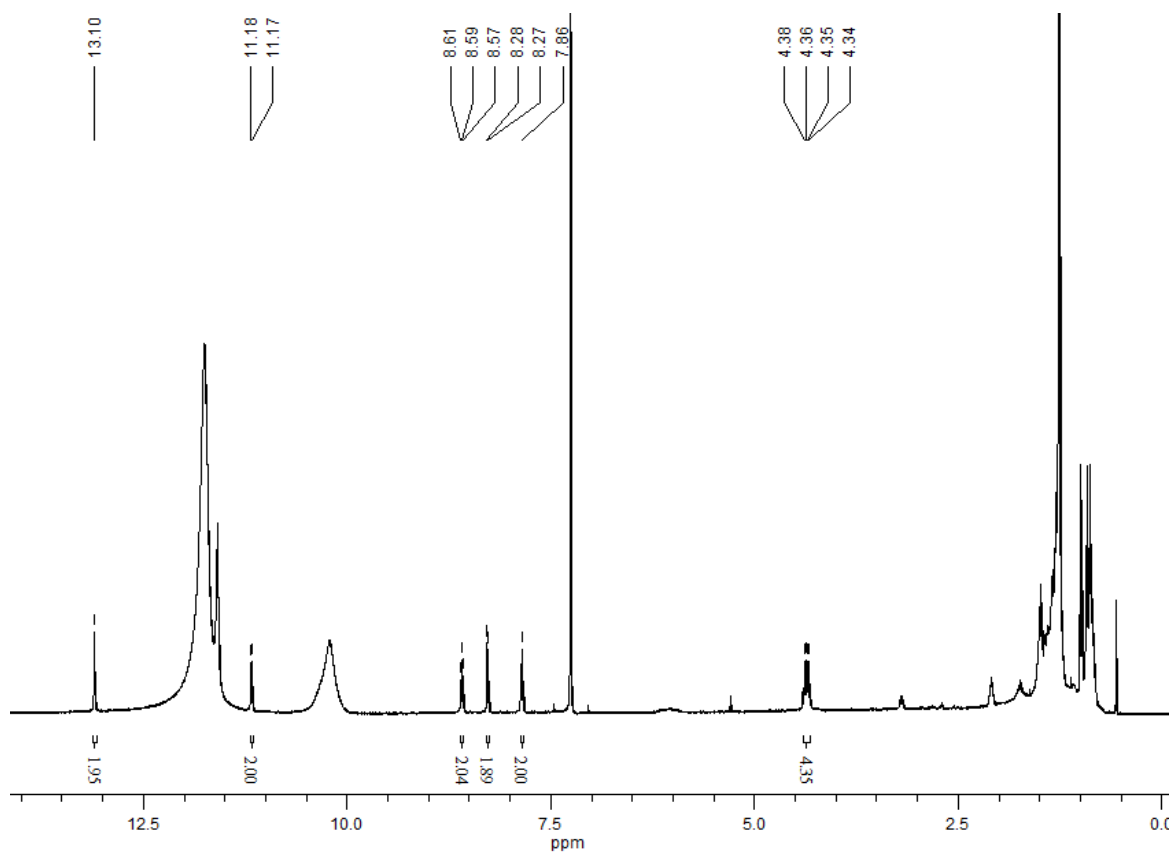

**Fig. S7**  $^1\text{H}$  NMR (500 MHz,  $\text{CDCl}_3$ , 293K) spectra of **aImPyDI** in presence of triflic acid.

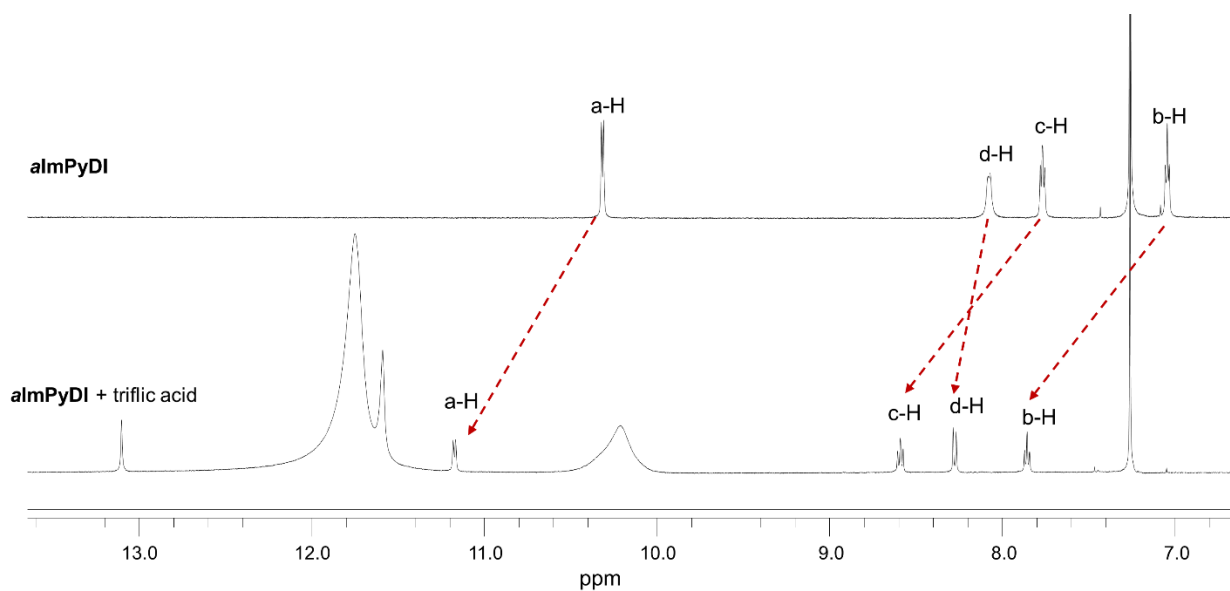

**Fig. S8** Partial  $^1\text{H}$  NMR (500 MHz,  $\text{CDCl}_3$ , 293K) spectra of **aImPyDI** (top) and its protonated form (bottom).

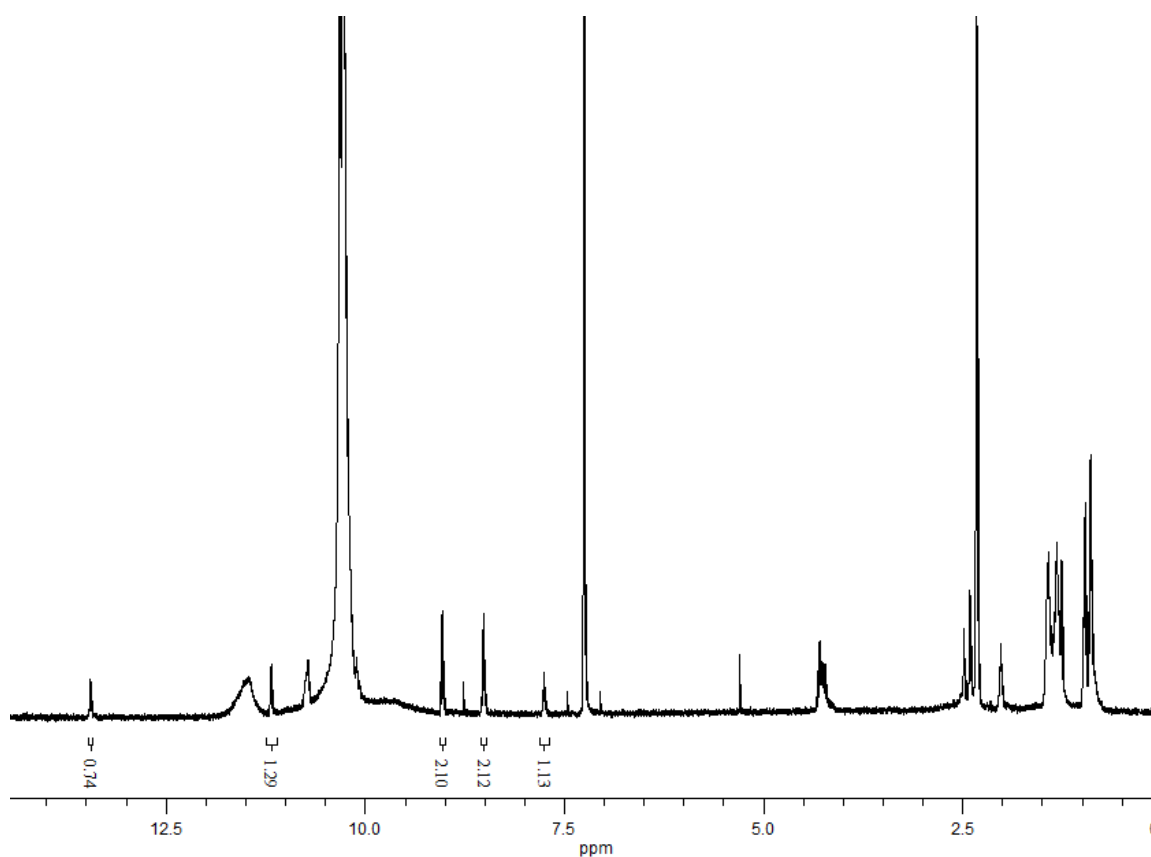

**Fig. S9**  $^1\text{H}$  NMR (500 MHz,  $\text{CDCl}_3$ , 293K) spectra of **bImPyDI** in presence of triflic acid.

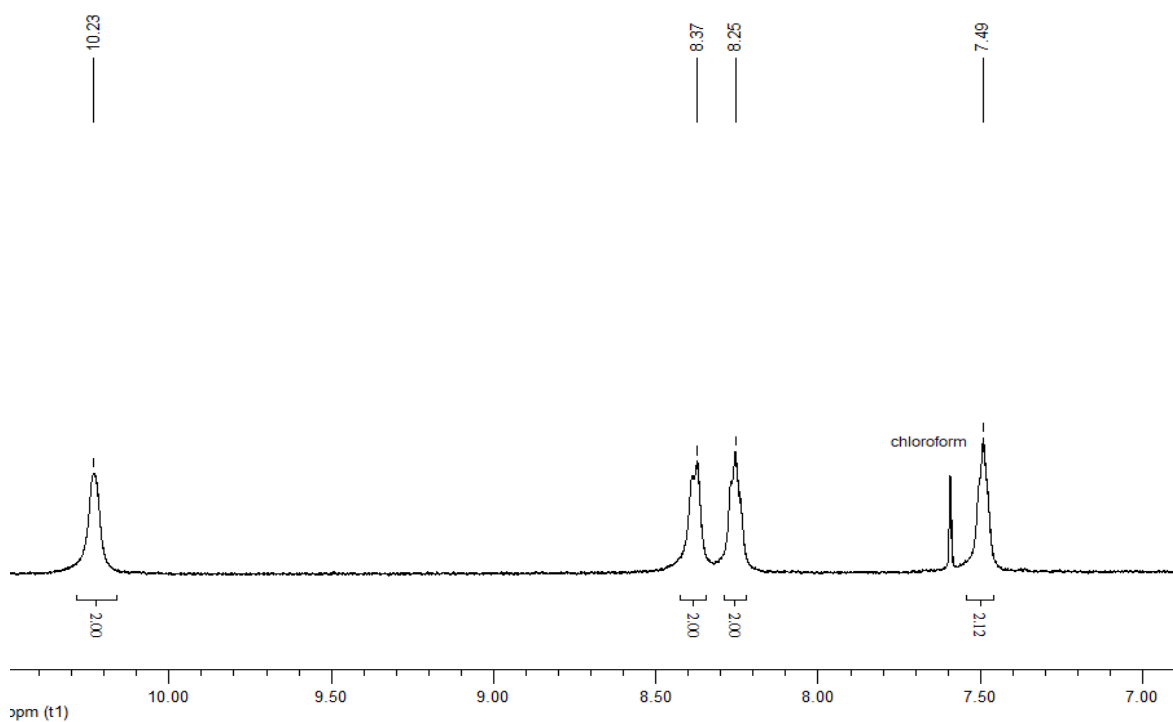

**Fig. S10** Partial  $^1\text{H}$  NMR (500 MHz, 293K) spectra of  $[(\mathbf{aImPyDI})\text{Zn}_2](\text{OTf})_4$  in  $\text{CD}_3\text{CN}$ . Single set of protons for imidazo[1,2-a]pyridine moiety confirms the formation of single product.

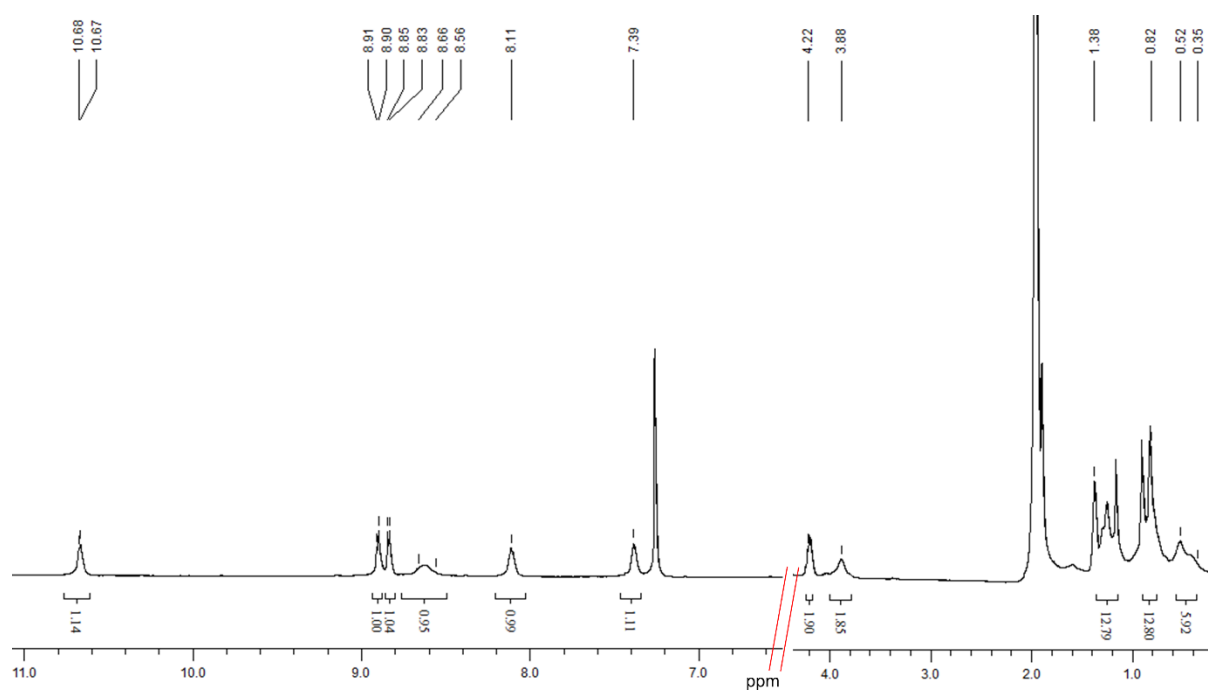

**Fig. S11**  $^1\text{H}$  NMR (500 MHz, 293K) spectra of  $[(b\text{ImPyDI})\text{Zn}](\text{OTf})_2$  in  $\text{CD}_3\text{CN}/\text{CDCl}_3$  40:1 (v/v).

## 4. Mass Spectra

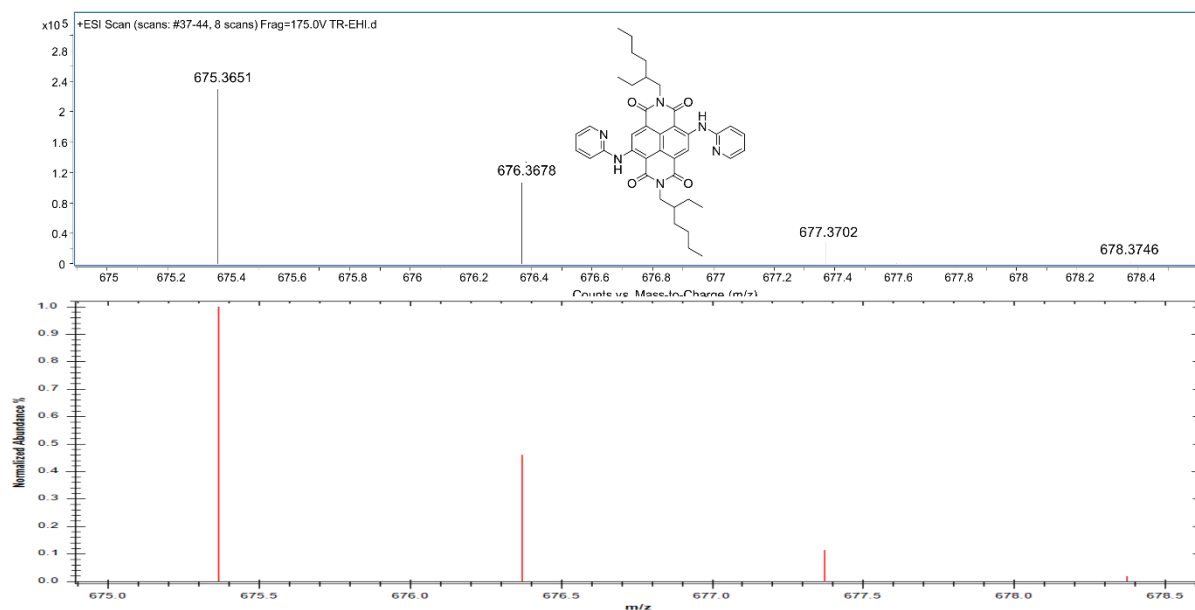

**Fig. S12** HRMS (ESI) spectrum (acetonitrile) of [AmPyDI + H]<sup>+</sup> along with calculated isotopic distribution (below, red).

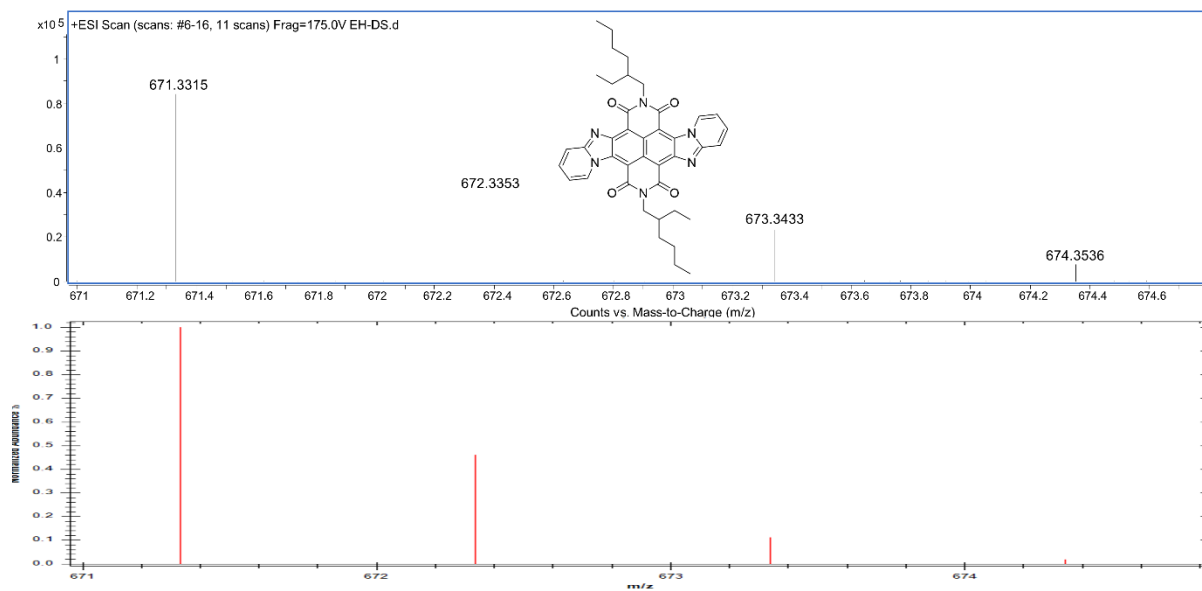

**Fig. S13** HRMS (ESI) spectrum (acetonitrile) of [aImPyDI + H]<sup>+</sup> along with calculated isotopic distribution (below, red).



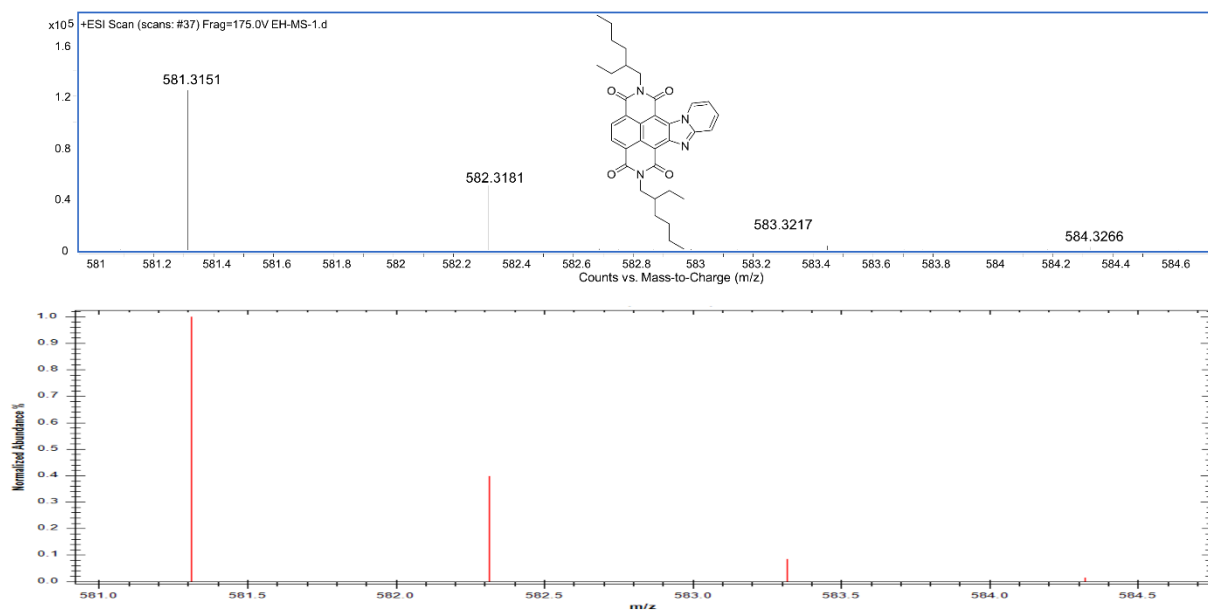

**Fig. S14** HRMS (ESI) spectrum (acetonitrile) of  $[bImPyDI + H]^+$  along with calculated isotopic distribution (below, red).

## 5. IR Spectra

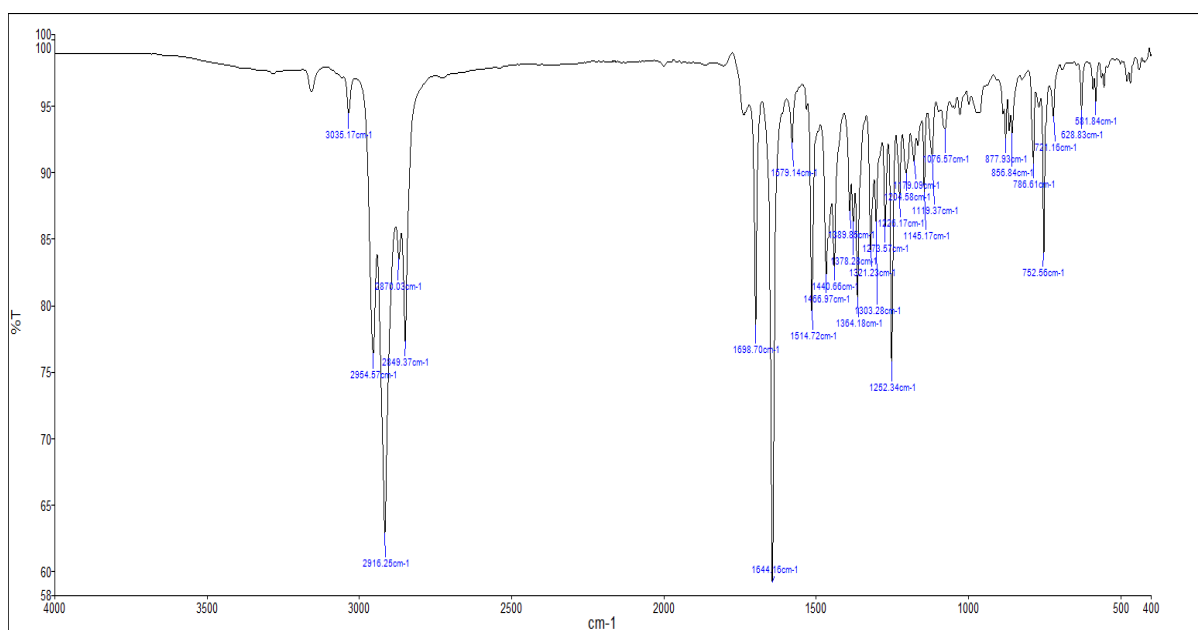

**Fig. S15** IR spectrum of *aImPyDI*. The measurement was done by drop casting a solution (chloroform) of the dye on the IR plate.

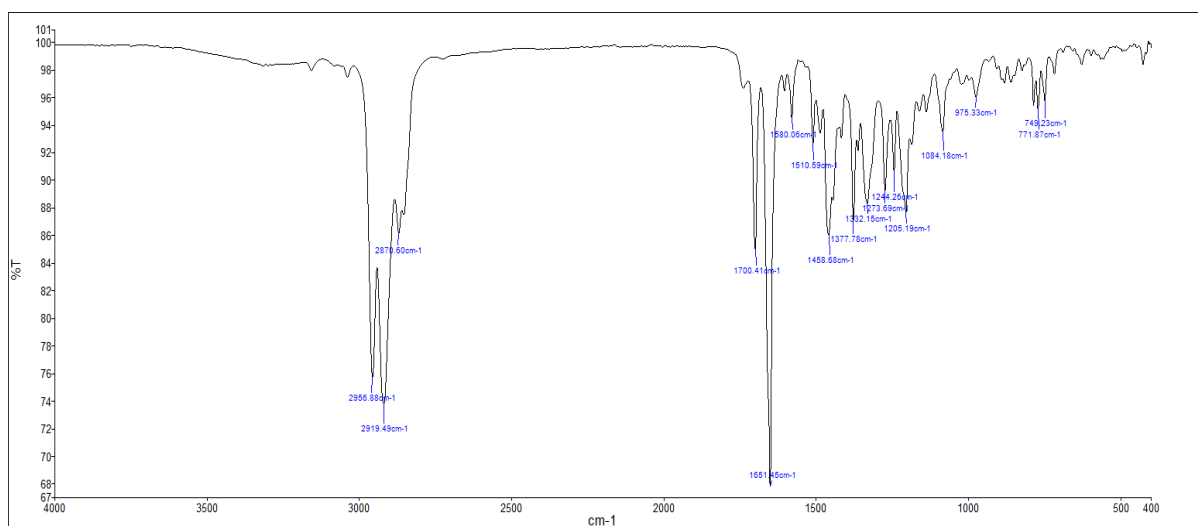

**Fig. S16** IR spectrum of *bImPyDI*. The measurement was done by drop casting a solution (chloroform) of the dye on the IR plate.

## 6. Absorption and photoluminescence spectroscopy

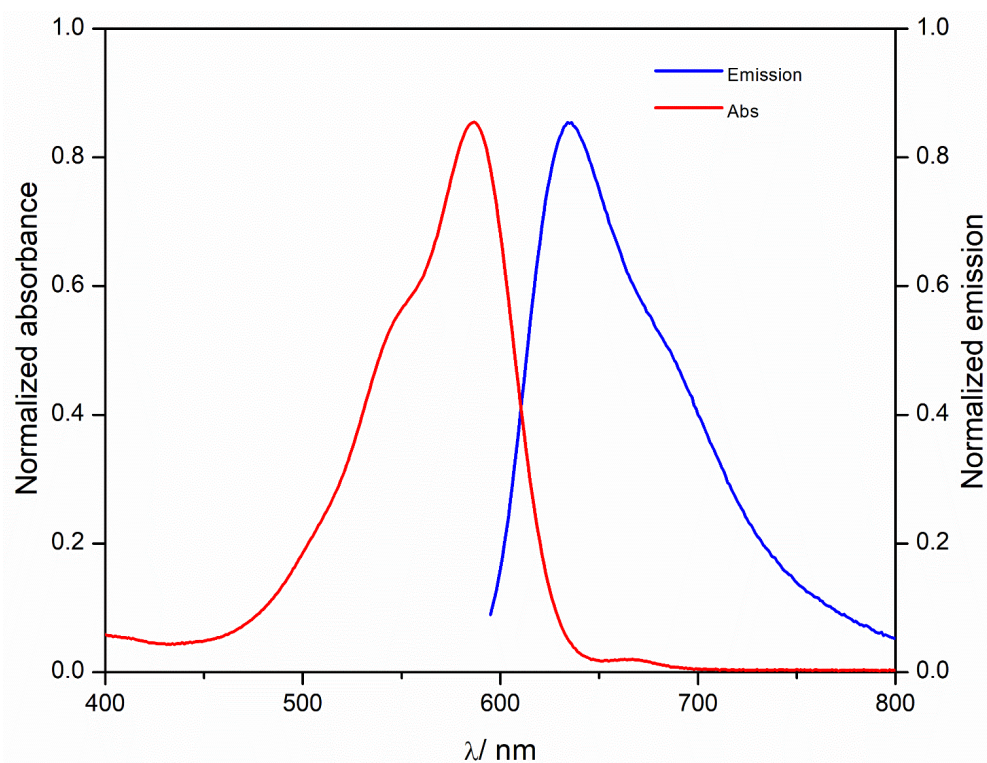

**Fig. S17** Absorption (red) and emission (blue) spectra of **AmPyDI** in chloroform ( $c \sim 1 \times 10^{-5}$  M).

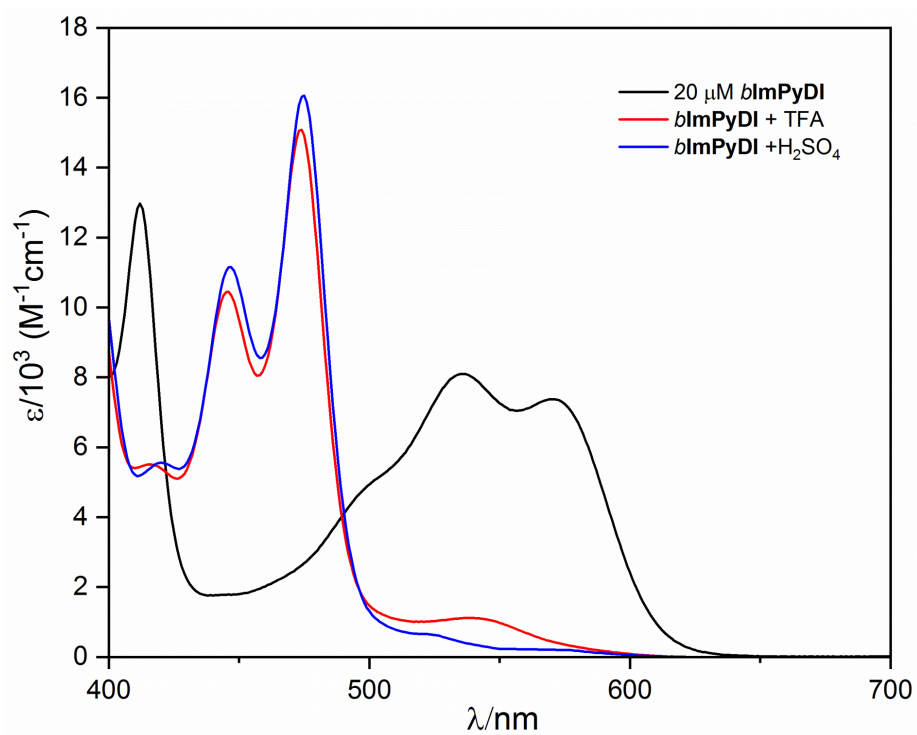

**Fig. S 18** Absorption spectra of **bImPyDI** in presence of various acids in chloroform.

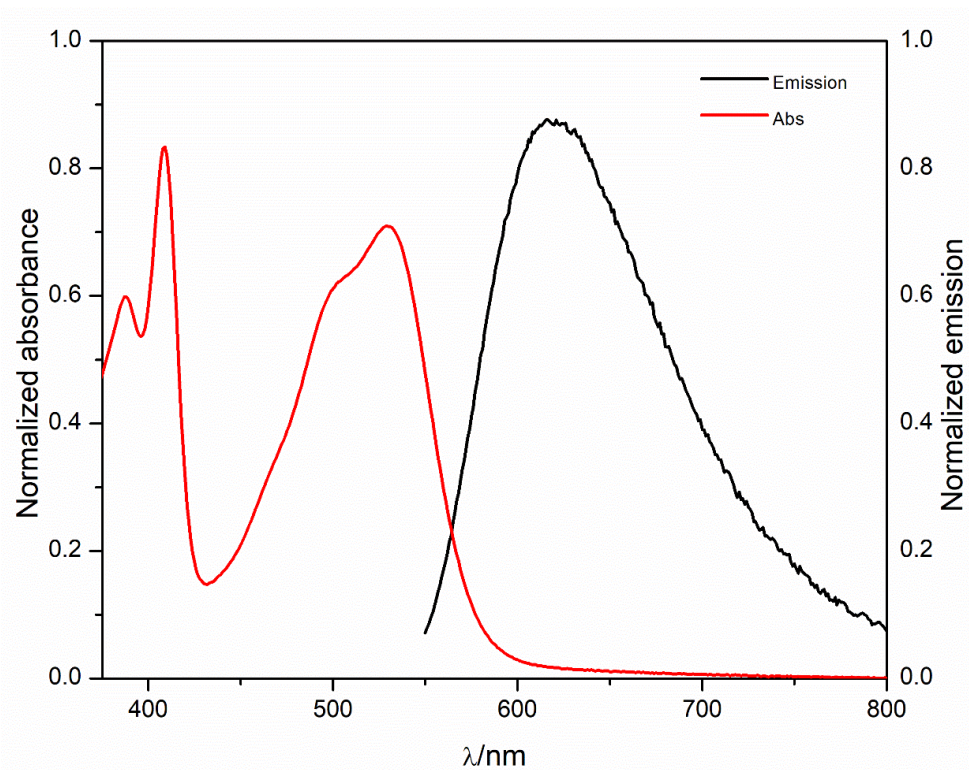

**Fig. S19** Absorption (red) and emission (black) spectra of  $[(bImPyDI)Zn](OTf)_2$  in acetonitrile ( $c \sim 5 \times 10^{-5}$  M).

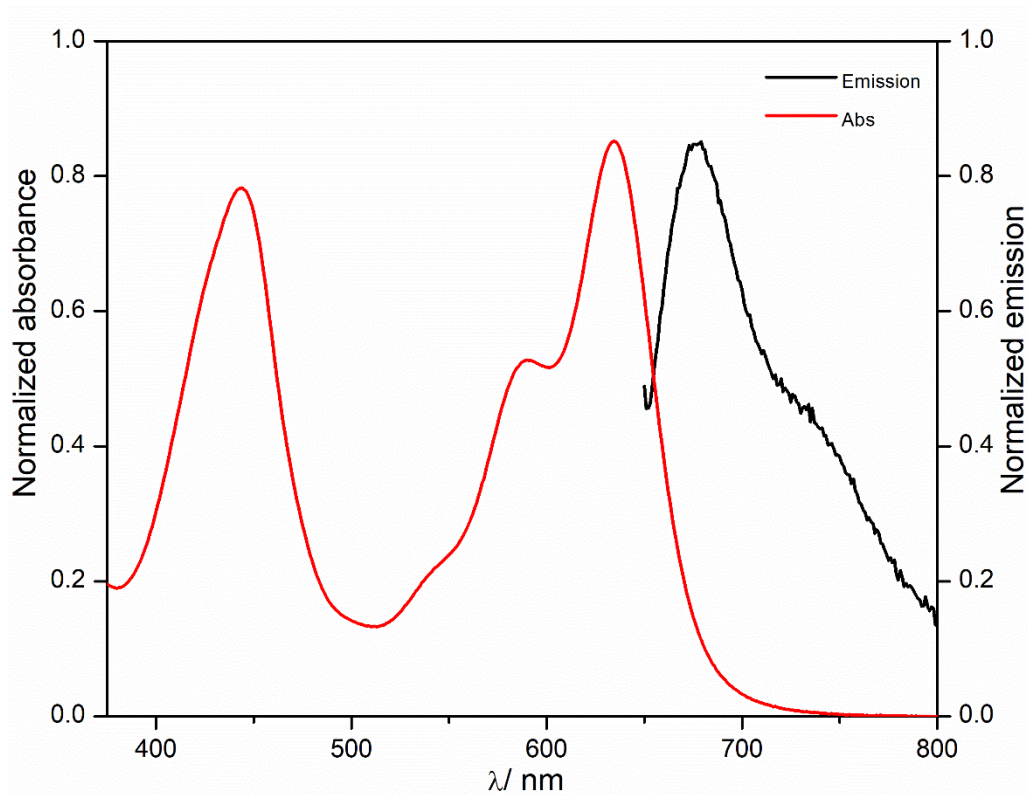

**Fig. S20** Absorption (red) and emission (black) spectra  $[(aImPyDI)Zn_2](OTf)_4$  in acetonitrile ( $c \sim 5 \times 10^{-4}$  M).

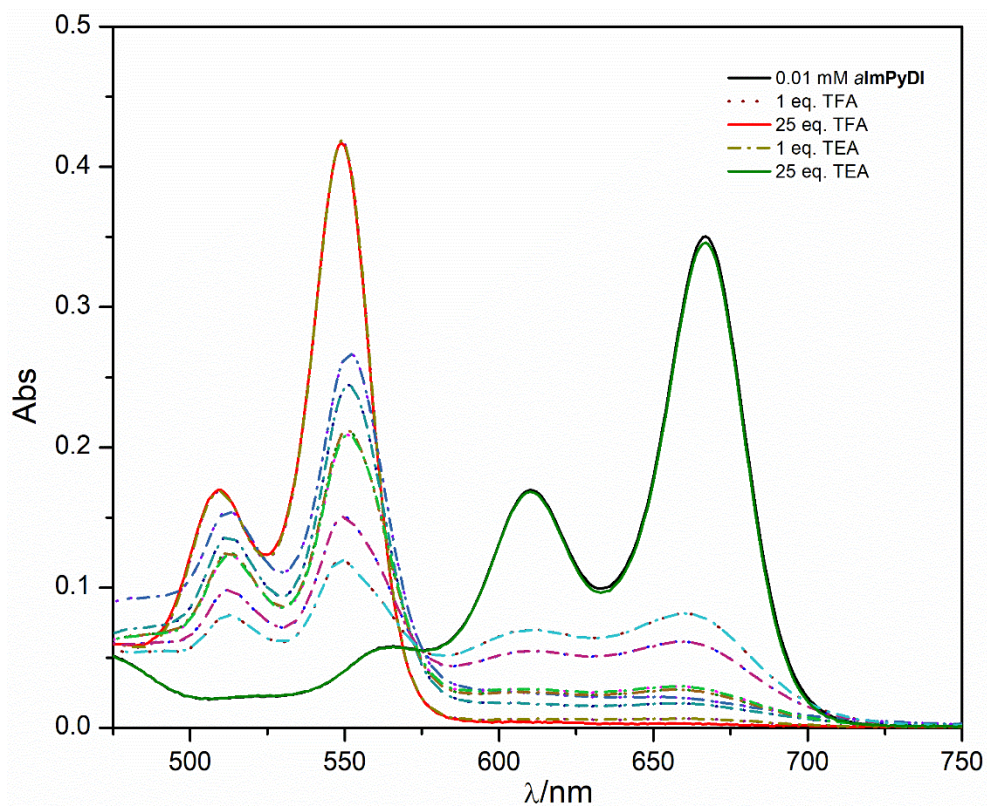

**Fig. S21** Halochromism and its reversibility of *aImPyDI* (0.01 mM) in chloroform (TFA: trifluoroacetic acid, TEA : tritethylamine)

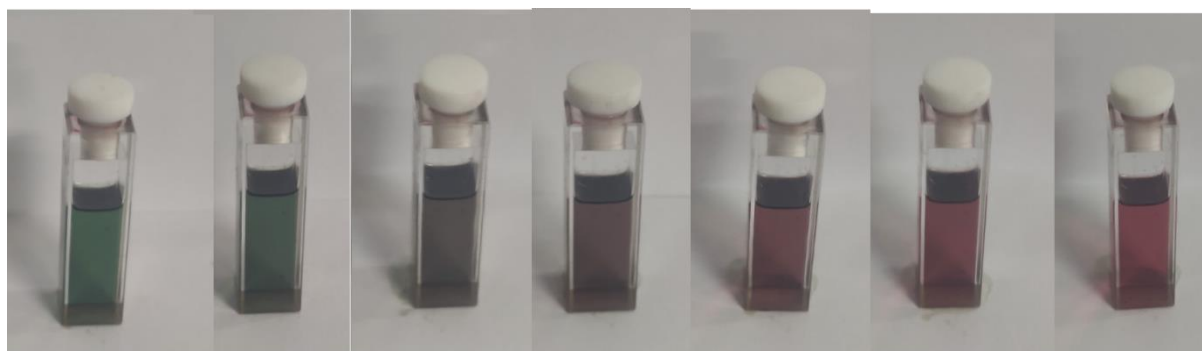

**Fig. S22** Visual change in colour of *aImPyDI* (0.01 mM ) in chloroform with gradual addition of TFA (left to right).

## Measurement of emission quantum yield

Relative quantum yield was measured in deoxygenated and dry chloroform using the following equation.

$$\Phi^i = \frac{F^i f_s n_i^2}{F^s f_i n_s^2} \Phi^s$$

where  $\Phi^i$  and  $\Phi^s$  are the photoluminescence quantum yields of the sample and that of the standard, respectively;  $F^i$  and  $F^s$  are the integrated intensities (areas) of sample and standard spectra, respectively;  $f_x$  is the absorption factor ( $f_x = 1 - 10^{-A_x}$ , where  $A$  = absorbance); the refractive indices of the sample and reference solution are  $n_i$  and  $n_s$ , respectively. Rhodamine 6G was used as reference ( $\Phi^s = 0.95$  in ethanol).

Relative quantum yield of **aImPyDI** and **bImPyDI** were found to be 0.45 and 0.52 respectively.

**Table S3** Quantum yield calculation data

| Compound                                    | Excitation Wavelength (nm) | $F^x$               | Absorbance | $f_x$  | Solvent / $n_x$     | Quantum Yield |
|---------------------------------------------|----------------------------|---------------------|------------|--------|---------------------|---------------|
| Rhodamine 6G                                | 480                        | $5.638 \times 10^8$ | 0.0995     | 0.2048 | Ethanol / 1.3614    | 0.95          |
| <b>aImPyDI</b><br>(1 <sup>st</sup> Reading) | 480                        | $2.186 \times 10^8$ | 0.0914     | 0.1897 | Chloroform / 1.4458 | 0.448         |
| <b>aImPyDI</b><br>(2 <sup>nd</sup> Reading) | 480                        | $1.684 \times 10^8$ | 0.068      | 0.1451 | Chloroform / 1.4458 | 0.452         |
| <b>aImPyDI</b><br>(3 <sup>rd</sup> Reading) | 480                        | $2.083 \times 10^8$ | 0.0861     | 0.1798 | Chloroform / 1.4458 | 0.451         |
| <b>bImPyDI</b><br>(1 <sup>st</sup> Reading) | 480                        | $2.363 \times 10^8$ | 0.0845     | 0.1768 | Chloroform / 1.4458 | 0.528         |
| <b>bImPyDI</b><br>(2 <sup>nd</sup> Reading) | 480                        | $2.323 \times 10^8$ | 0.0813     | 0.1707 | Chloroform / 1.4458 | 0.529         |
| <b>bImPyDI</b><br>(3 <sup>rd</sup> Reading) | 480                        | $1.674 \times 10^8$ | 0.0651     | 0.1392 | Chloroform / 1.4458 | 0.528         |

## 7. Electrochemistry

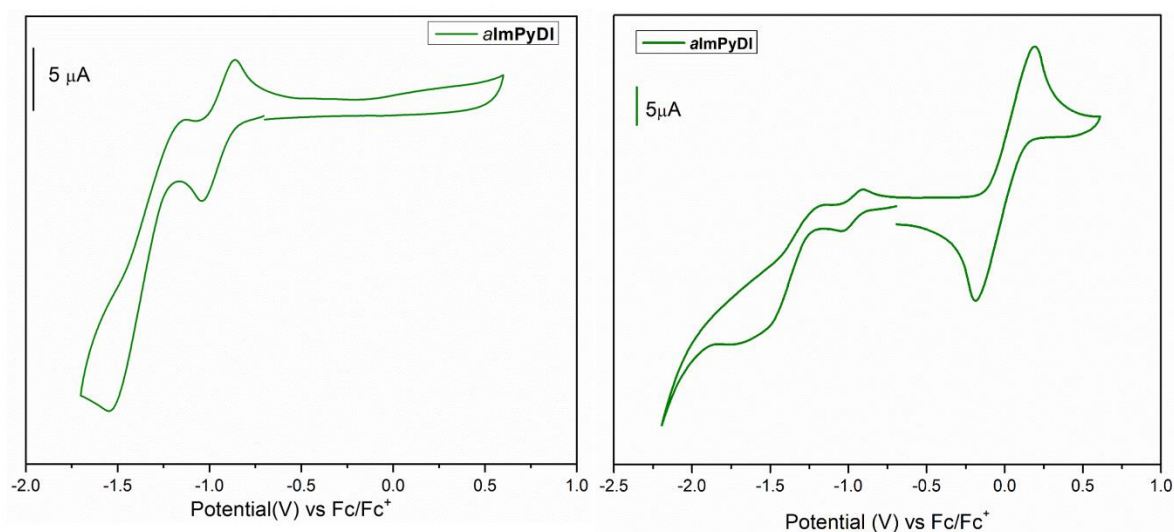

**Fig. S23** Cyclic voltammogram of *aImPyDI* in dry and deoxygenated chloroform in absence (left), and in presence (right) of internal standard ferrocene. The experiments were carried out using a 0.75 mM solution of the dye with *n*Bu<sub>4</sub>NPF<sub>6</sub> (0.1 M) as electrolyte against a Ag/AgCl reference electrode. Pt wire was used as auxiliary electrode and 3 mm glassy carbon disk as working electrode (scan rate 100 mV s<sup>-1</sup>).

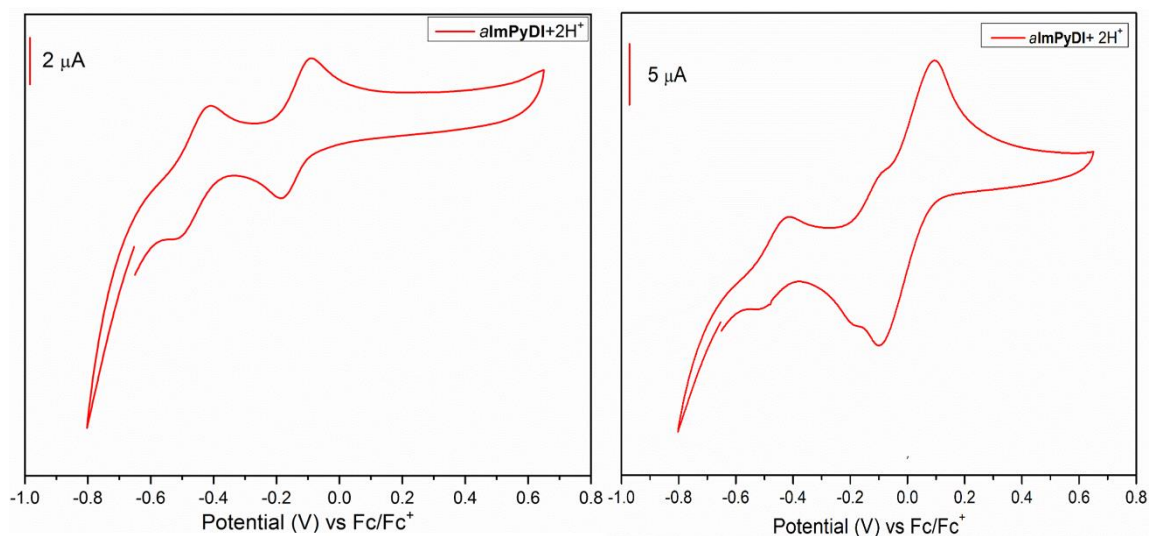

**Fig. S24.** Cyclic voltammogram of protonated *aImPyDI* in deoxygenated chloroform in absence (left), and in presence (right) of internal standard ferrocene. The experiments were carried out using a 0.75 mM solution of the dye with *n*Bu<sub>4</sub>NPF<sub>6</sub> (0.1 M) as electrolyte against a Ag/AgCl reference electrode. Pt wire was used as auxiliary electrode and 3 mm glassy carbon disk as working electrode (scan rate 100 mV s<sup>-1</sup>).

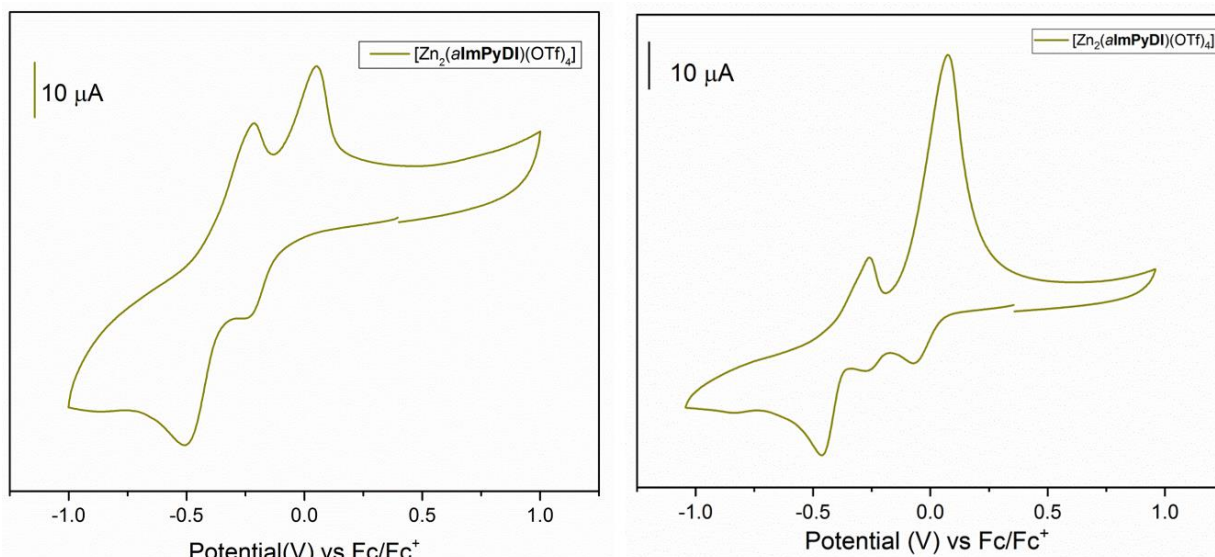

**Fig. S25** Cyclic voltammogram of  $\text{Zn}^{2+}$ -coordinated **aImPyDI** in dry and deoxygenated acetonitrile in absence (left), and in presence (right) of internal standard ferrocene. The experiments were carried out using a 0.75 mM solution of the dye with  $n\text{Bu}_4\text{NPF}_6$  (0.1 M) as electrolyte against a Ag/AgCl reference electrode. Pt wire was used as auxiliary electrode and 3 mm glassy carbon disk as working electrode (scan rate  $100 \text{ mVs}^{-1}$ ).

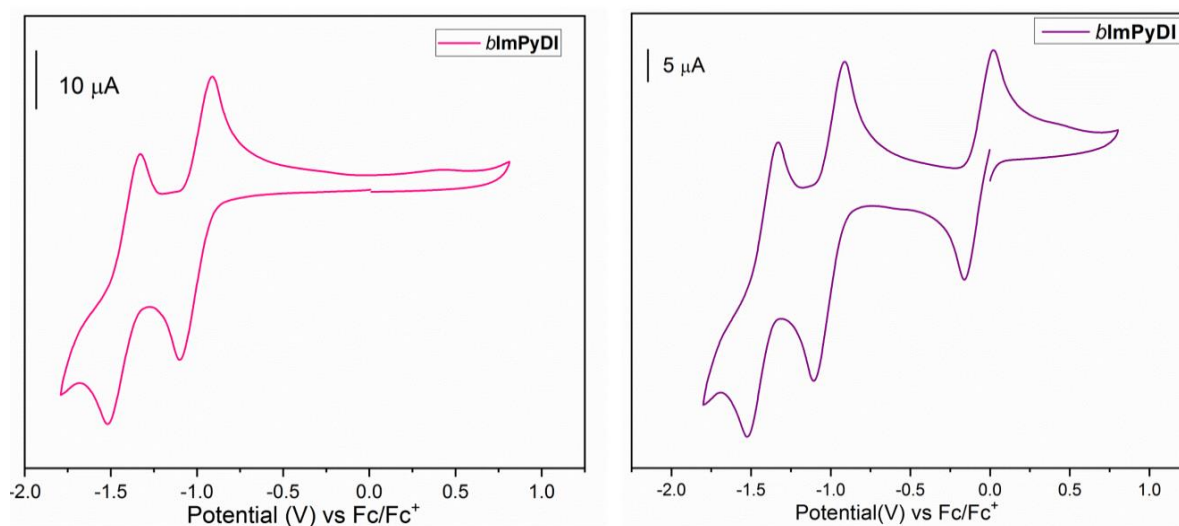

**Fig. S26** Cyclic voltammogram of **bImPyDI** in dry and deoxygenated chloroform in absence (left), and in presence (right) of internal standard ferrocene. The experiments were carried out using a 0.75 mM solution of the dye with  $n\text{Bu}_4\text{NPF}_6$  (0.1 M) as electrolyte against a Ag/AgCl reference electrode. Pt wire as used as auxiliary electrode and 3 mm glassy carbon disk as working electrode (scan rate  $100 \text{ mVs}^{-1}$ ).



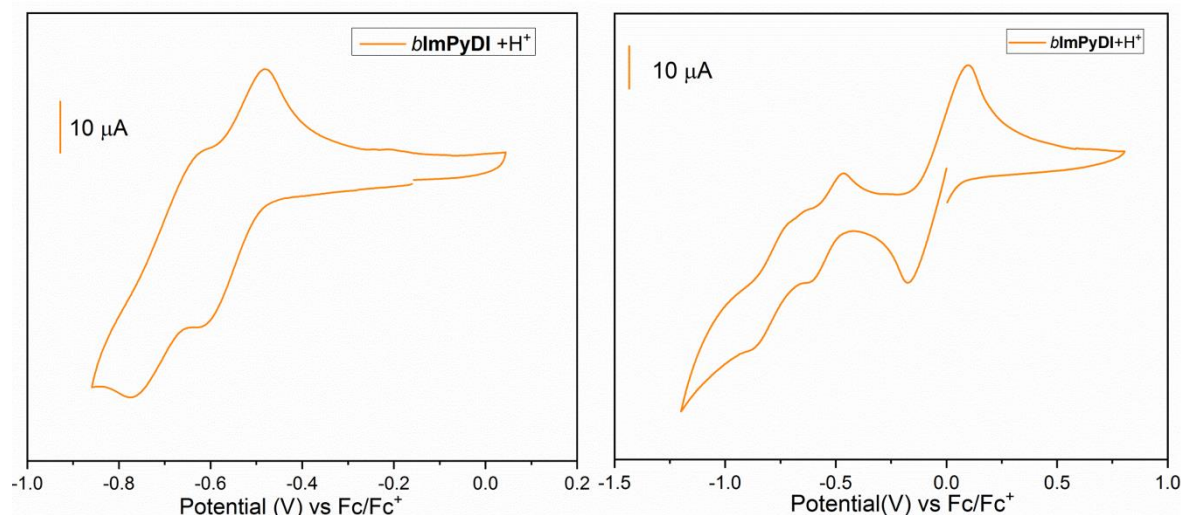

**Fig. S27** Cyclic voltammogram of protonated **bImPyDI** in deoxygenated chloroform in absence (left), and in presence (right) of internal standard ferrocene. The experiments were carried out using a 0.75 mM solution of the dye with  $n\text{Bu}_4\text{NPF}_6$  (0.1 M) as electrolyte against a Ag/AgCl reference electrode. Pt wire was used as auxiliary electrode and 3 mm glassy carbon disk as working electrode (scan rate  $100 \text{ mVs}^{-1}$ ).

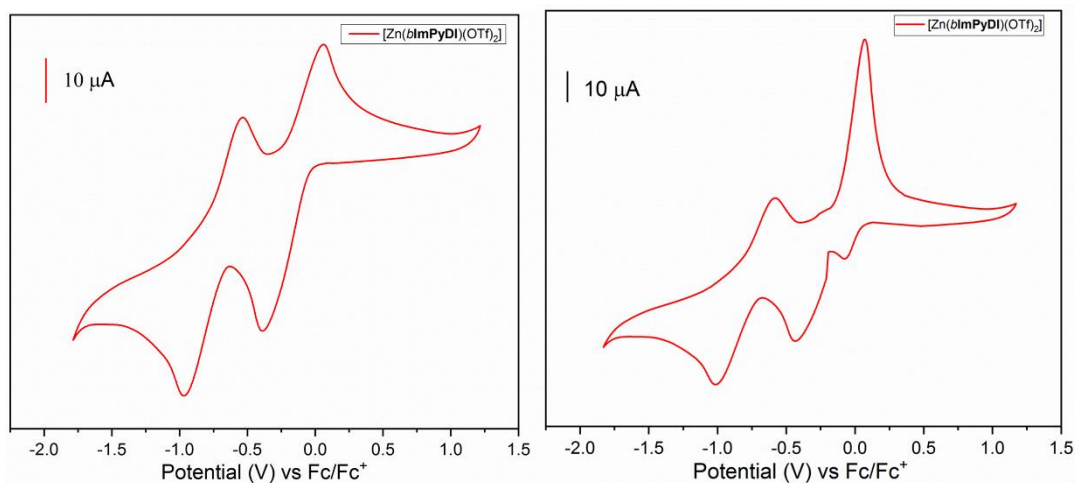

**Fig. S28** Cyclic voltammogram of  $\text{Zn}^{2+}$ -coordinated **bImPyDI** in dry and deoxygenated chloroform/acetonitrile (80/1 v/v) mixture in absence (left), and in presence (right) of internal standard ferrocene. The experiments were carried out using a 0.75 mM solution of the dye with  $n\text{Bu}_4\text{NPF}_6$  (0.1 M) as electrolyte against a Ag/AgCl reference electrode. Pt wire was used as auxiliary electrode and 3 mm glassy carbon disk as working electrode (scan rate  $100 \text{ mVs}^{-1}$ ).

## 8. References

---

- 1 (a) S. Kuila, A. Ghorai, P. K. Samanta, R. B. K. Siram, S. K. Pati, K. S. Narayan and S. J. George, *Chem. Eur. J.*, **2019**, 25, 16007-16011; (b) S. Debnath, C. J. Boyle, D. Zhou, B. M. Wong, K. R. Kittilstved and D. Venkataraman, *RSC Adv.*, **2018**, 8, 14760-14764; (c) M. Sasikumar, Y. V. Suseela and T. Govindaraju, *Asian J. Org. Chem.*, **2013**, 2, 779-785.
- 2 (a) B. Miehlich, A. Savin, H. Stoll, H. Preuss, *Chem. Phys. Lett.* **1989**, 157, 200–206; (b) P. C. Hariharan, J. A. Pople, *Theor. Chim. Acta* **1973**, 28, 213–222.
